# Supplementary material for: Effect of Tezepelumab on Lung Function in Patients With Severe, Uncontrolled Asthma in the Phase 3 NAVIGATOR Study
Source: PubMed Central journal article supplement — Adv Ther. 2023 Sep 19;40(11):4957–71. doi: 10.1007/s12325-023-02659-y (PMC10567907; doi:10.1007/s12325-023-02659-y), 2023-09-19
Supplement: 12325_2023_2659_MOESM1_ESM.pdf [file 12325_2023_2659_MOESM1_ESM.pdf]

# **Effect of Tezepelumab on Lung Function in Patients With Severe, Uncontrolled Asthma in the Phase 3 NAVIGATOR Study**

Andrew Menzies-Gow,<sup>1</sup> Christopher S. Ambrose,<sup>2</sup> Gene Colice,<sup>3</sup> Gillian Hunter,<sup>4</sup> Bill Cook,<sup>2</sup> Nestor A. Molfino,<sup>5</sup> Jean-Pierre Llanos,<sup>6</sup> Elliot Israel<sup>7</sup>

<sup>1</sup>Royal Brompton and Harefield Hospitals, School of Immunology & Microbial Sciences, King's College London, London, UK; <sup>2</sup>Respiratory and Immunology, BioPharmaceuticals Medical, AstraZeneca, Gaithersburg, MD, USA; <sup>3</sup>Late-stage Development, Respiratory and Immunology, BioPharmaceuticals R&D, AstraZeneca, Gaithersburg, MD, USA; <sup>4</sup>Biometrics, Late-stage Development, Respiratory and Immunology, BioPharmaceuticals R&D, AstraZeneca, Cambridge, UK; <sup>5</sup>Global Development, Amgen, Thousand Oaks, CA, USA; <sup>6</sup>Global Medical Affairs, Amgen, Thousand Oaks, CA, USA; <sup>7</sup>Pulmonary and Critical Care Medicine, Allergy & Immunology, Brigham and Women's Hospital, Harvard Medical School, Boston, MA, USA.

## **Corresponding author:**

Andrew Menzies-Gow

Department of Respiratory Medicine

Royal Brompton Hospital, Sydney Street,

London SW3 6NP, United Kingdom

e-mail: [andrew.menzies-gow@astrazeneca.com](mailto:andrew.menzies-gow@astrazeneca.com)

**Table S1** Baseline demographics and clinical characteristics in the overall NAVIGATOR cohort

| Demographic/characteristic                                     | Tezepelumab 210 mg Q4W ( <i>n</i> = 528) | Placebo ( <i>n</i> = 531) |
|----------------------------------------------------------------|------------------------------------------|---------------------------|
| Age, years, mean (SD)                                          | 49.9 (16.3)                              | 49.0 (15.9)               |
| Female, <i>n</i> (%)                                           | 335 (63.4)                               | 337 (63.5)                |
| BMI, kg/m <sup>2</sup> , mean (SD)                             | 28.7 (7.1)                               | 28.3 (6.9)                |
| ICS dose level, <i>n</i> (%) <sup>a</sup>                      |                                          |                           |
| Medium                                                         | 131 (24.8)                               | 132 (24.9)                |
| High                                                           | 397 (75.2)                               | 398 (75.0)                |
| Maintenance OCS use, <i>n</i> (%)                              | 49 (9.3)                                 | 51 (9.6)                  |
| Prebronchodilator FEV <sub>1</sub> , L, mean (SD)              | 1.8 (0.7)                                | 1.9 (0.7)                 |
| Prebronchodilator FEV <sub>1</sub> reversibility, %, mean (SD) | 15.0 (15.6)                              | 15.1 (15.2)               |
| Postbronchodilator FEV <sub>1</sub> reversibility, <i>n</i>    |                                          |                           |
| < 20%                                                          | 391                                      | 388                       |
| ≥ 20%                                                          | 137                                      | 143                       |
| Prebronchodilator ppFEV <sub>1</sub> , mean (SD)               | 62.8 (18.0)                              | 62.7 (18.0)               |
| Postbronchodilator FEV <sub>1</sub> , L, mean (SD)             | 2.1 (0.8)                                | 2.1 (0.8)                 |
| Morning PEF, L/min, weekly mean (SD)                           | 261.7 (109.7)                            | 262.5 (105.8)             |
| Evening PEF, L/min, weekly mean (SD)                           | 277.0 (111.3)                            | 278.2 (106.9)             |

|                                                             |                       |                     |
|-------------------------------------------------------------|-----------------------|---------------------|
| Number of exacerbations in the past 12 months, <i>n</i> (%) |                       |                     |
| 2                                                           | 310 (58.7)            | 324 (61.0)          |
| > 2                                                         | 218 (41.3)            | 206 (38.8)          |
| Serum total IgE, IU/mL, median (min, max)                   | 194.9 (1.5, 12,823.2) | 196.7 (1.5, 9740.9) |
| Blood eosinophil count, cells/ $\mu$ L, median (min, max)   | 250 (0, 3650)         | 250 (0, 8170)       |
| FeNO, ppb, median (min, max)                                | 31.0 (5.0, 235.0)     | 30.0 (5.0, 265.0)   |

*BMI* body mass index, *FeNO* fractional exhaled nitric oxide, *FEV<sub>1</sub>* forced expiratory volume in 1 second, *ppFEV<sub>1</sub>* percent predicted forced expiratory volume in 1 second, *ICS* inhaled corticosteroids, *IgE* immunoglobulin E, *max* maximum, *min* minimum, *OCS* oral corticosteroid, *PEF* peak expiratory flow, *Q4W* every 4 weeks, *SD* standard deviation

- 1 **Table S2** Demographics and clinical characteristics of patients grouped by disease duration at baseline, baseline postbronchodilator FEV<sub>1</sub>
- 2 reversibility, baseline postbronchodilator FEV<sub>1</sub>/FVC ratio, and combined baseline postbronchodilator FEV<sub>1</sub> reversibility and postbronchodilator
- 3 FEV<sub>1</sub>/FVC ratio

| Demographic/characteristic                            | Subgroup                |                         |                                                   |                              |                                                |                    |                                                                                                      |                                 |                                 |                                |
|-------------------------------------------------------|-------------------------|-------------------------|---------------------------------------------------|------------------------------|------------------------------------------------|--------------------|------------------------------------------------------------------------------------------------------|---------------------------------|---------------------------------|--------------------------------|
|                                                       | Disease duration        |                         | Postbronchodilator FEV <sub>1</sub> reversibility |                              | Postbronchodilator FEV <sub>1</sub> /FVC ratio |                    | Postbronchodilator FEV <sub>1</sub> reversibility and postbronchodilator FEV <sub>1</sub> /FVC ratio |                                 |                                 |                                |
|                                                       | < 20 years<br>(n = 559) | ≥ 20 years<br>(n = 500) | Low<br>(< 20%)<br>(n = 779)                       | High<br>(≥ 20%)<br>(n = 280) | < 0.7<br>(n = 617)                             | ≥ 0.7<br>(n = 442) | < 0.7 and<br>< 20%<br>(n = 433)                                                                      | < 0.7 and<br>≥ 20%<br>(n = 184) | ≥ 0.7 and<br>< 20%<br>(n = 346) | ≥ 0.7 and<br>≥ 20%<br>(n = 96) |
| Age, years, mean (SD)                                 | 46.3 (17.8)             | 53.0 (13.0)             | 49.8 (16.4)                                       | 48.5 (15.2)                  | 53.7 (12.9)                                    | 43.5 (18.1)        | 55.0 (12.0)                                                                                          | 50.7 (14.2)                     | 43.2 (18.6)                     | 44.3 (16.3)                    |
| Age group, n (%)                                      |                         |                         |                                                   |                              |                                                |                    |                                                                                                      |                                 |                                 |                                |
| Adolescent: 12 to 18 years                            | 82 (14.7)               | 0 (0.0)                 | 66 (8.5)                                          | 16 (5.7)                     | 7 (1.1)                                        | 75 (17.0)          | 1 (0.2)                                                                                              | 6 (3.3)                         | 65 (18.8)                       | 10 (10.4)                      |
| Adult: ≥ 18 to < 65 years                             | 409 (73.2)              | 398 (79.6)              | 577 (74.1)                                        | 230 (82.1)                   | 487 (78.9)                                     | 320 (72.4)         | 337 (77.8)                                                                                           | 150 (81.5)                      | 240 (69.4)                      | 80 (83.3)                      |
| Adult: ≥ 65 years                                     | 68 (12.2)               | 102 (20.4)              | 136 (17.5)                                        | 34 (12.1)                    | 123 (19.9)                                     | 47 (10.6)          | 95 (21.9)                                                                                            | 28 (15.2)                       | 41 (11.8)                       | 6 (6.3)                        |
| Female, n (%)                                         | 334 (59.7)              | 338 (67.6)              | 483 (62.0)                                        | 189 (67.5)                   | 371 (60.1)                                     | 301 (68.1)         | 252 (58.2)                                                                                           | 119 (64.7)                      | 231 (66.8)                      | 70 (72.9)                      |
| BMI, kg/m <sup>2</sup> , mean (SD)                    | 27.5 (6.7)              | 29.6 (7.1)              | 28.6 (7.1)                                        | 28.3 (6.6)                   | 28.3 (6.6)                                     | 28.7 (7.5)         | 28.4 (6.5)                                                                                           | 28.2 (7.0)                      | 28.8 (7.8)                      | 28.4 (6.0)                     |
| Time since asthma diagnosis, years, median (min, max) | 10.0 (1.0, 19.3)        | 34.0 (20.0, 69.0)       | -                                                 | -                            | -                                              | -                  | -                                                                                                    | -                               | -                               | -                              |
| ICS dose level, n (%) <sup>a</sup>                    |                         |                         |                                                   |                              |                                                |                    |                                                                                                      |                                 |                                 |                                |
| Medium                                                | 165 (29.5)              | 98 (19.6)               | 205 (26.3)                                        | 58 (20.7)                    | 126 (20.4)                                     | 137 (31.0)         | 91 (21.0)                                                                                            | 35 (19.0)                       | 114 (32.9)                      | 23 (24.0)                      |
| High                                                  | 394 (70.5)              | 401 (80.2)              | 573 (73.6)                                        | 222 (79.3)                   | 490 (79.4)                                     | 305 (69.0)         | 341 (78.8)                                                                                           | 149 (81.0)                      | 232 (67.1)                      | 73 (76.0)                      |

|                                                                 |                       |                      |                       |                      |                       |                    |                       |                     |                    |                    |
|-----------------------------------------------------------------|-----------------------|----------------------|-----------------------|----------------------|-----------------------|--------------------|-----------------------|---------------------|--------------------|--------------------|
| Maintenance OCS use, <i>n</i> (%)                               | 54 (9.7)              | 46 (9.2)             | 73 (9.4)              | 27 (9.6)             | 69 (11.2)             | 31 (7.0)           | 48 (11.1)             | 21 (11.4)           | 25 (7.2)           | 6 (6.3)            |
| Number of exacerbations in the past 12 months, <i>n</i> (%)     |                       |                      |                       |                      |                       |                    |                       |                     |                    |                    |
| 2                                                               | 321 (57.4)            | 313 (62.6)           | 470 (60.3)            | 164 (58.6)           | 350 (56.7)            | 284 (64.3)         | 246 (56.8)            | 104 (56.5)          | 224 (64.7)         | 60 (62.5)          |
| > 2                                                             | 237 (42.4)            | 187 (37.4)           | 308 (39.5)            | 116 (41.4)           | 267 (43.3)            | 157 (35.5)         | 187 (43.2)            | 80 (43.5)           | 121 (35.0)         | 36 (37.5)          |
| Prebronchodilator FEV <sub>1</sub> , L, mean (SD)               | 2.0 (0.8)             | 1.7 (0.6)            | 2.0 (0.7)             | 1.5 (0.6)            | 1.5 (0.5)             | 2.3 (0.7)          | 1.6 (0.5)             | 1.4 (0.5)           | 2.4 (0.7)          | 1.9 (0.5)          |
| Prebronchodilator ppFEV <sub>1</sub> , mean (SD)                | 65.5 (19.1)           | 59.7 (16.0)          | 66.4 (17.6)           | 52.6 (14.8)          | 53.9 (14.7)           | 75.2 (14.3)        | 56.7 (14.4)           | 47.2 (13.3)         | 78.6 (13.0)        | 62.9 (12.0)        |
| Postbronchodilator FEV <sub>1</sub> reversibility, %, mean (SD) | 14.6 (14.7)           | 15.6 (16.2)          | 7.9 (6.6)             | 35.0 (15.3)          | 16.4 (16.2)           | 13.1 (14.1)        | 8.3 (6.8)             | 35.4 (16.0)         | 7.3 (6.4)          | 34.3 (13.9)        |
| Prebronchodilator FVC, L, mean (SD)                             | 3.0 (1.0)             | 2.8 (0.9)            | 3.0 (0.9)             | 2.7 (0.9)            | 2.8 (0.9)             | 3.1 (0.9)          | 3.0 (0.9)             | 2.7 (0.9)           | 3.1 (0.9)          | 2.7 (0.8)          |
| Prebronchodilator FEF <sub>25-75</sub> , L/s, mean (SD)         | 1.3 (1.0)             | 0.9 (0.6)            | 1.3 (0.9)             | 0.8 (0.5)            | 0.7 (0.3)             | 1.8 (0.9)          | 0.7 (0.3)             | 0.6 (0.3)           | 1.9 (0.9)          | 1.2 (0.6)          |
| Blood eosinophil count, cells/ $\mu$ L, median (min, max)       | 270<br>(0, 4640)      | 240<br>(0, 8170)     | 240<br>(0, 8170)      | 280<br>(0, 1340)     | 280<br>(0, 8170)      | 220<br>(0, 1340)   | 260<br>(0, 8170)      | 300<br>(10, 1310)   | 220<br>(0, 1240)   | 225<br>(0, 1340)   |
| FeNO, ppb, median (min, max)                                    | 35.0<br>(5.0, 265.0)  | 26.0<br>(5.0, 258.0) | 28.5<br>(5.0, 258.0)  | 34.0<br>(5.0, 265.0) | 31<br>(5.0, 258.0)    | 28<br>(5.0, 265.0) | 31<br>(5.0, 258.0)    | 33<br>(5.0, 193.0)  | 27<br>(5.0, 235.0) | 37<br>(5.0, 265.0) |
| Serum total IgE, IU/mL, median (min, max)                       | 209.8 (1.5, 12,823.2) | 175.4 (1.5, 7406.3)  | 189.0 (1.5, 12,823.2) | 212.7 (1.5, 9740.9)  | 192.7 (1.5, 12,823.2) | 205 (1.5, 9740.9)  | 177.1 (1.5, 12,823.2) | 209.3 (1.5, 5587.1) | 196 (1.5, 6136.5)  | 254 (1.5, 9740.9)  |

4 *BMI* body mass index, *FEF<sub>25-75</sub>* forced expiratory flow between 25% and 75% of vital capacity, *FeNO* fractional exhaled nitric oxide, *ppFEV<sub>1</sub>*  
5 percent predicted forced expiratory volume in 1 second, *FEV<sub>1</sub>* forced expiratory volume in 1 second, *FVC* forced vital capacity, *ICS* inhaled  
6 corticosteroids, *IgE* immunoglobulin E, *max* maximum, *min* minimum, *OCS* oral corticosteroid, *SD* standard deviation  
7 <sup>a</sup>Medium-dose ICS: fluticasone propionate 500 µg/day or equivalent; high-dose ICS: fluticasone propionate > 500 µg/day or equivalent

8

9 **Table S3** Change from baseline in prebronchodilator FEF<sub>25-75</sub> in patients grouped by disease duration at baseline, baseline postbronchodilator  
 10 FEV<sub>1</sub> reversibility, and baseline postbronchodilator FEV<sub>1</sub>/FVC ratio

| Subgroup                                                   | Mean at baseline (SD), L/s |           | LS mean change from baseline<br>(SE), L/s |              | LS mean difference<br>versus placebo (95% CI), L/s |
|------------------------------------------------------------|----------------------------|-----------|-------------------------------------------|--------------|----------------------------------------------------|
|                                                            | Tezepelumab<br>210 mg Q4W  | Placebo   | Tezepelumab<br>210 mg Q4W                 | Placebo      |                                                    |
|                                                            | <hr/>                      |           |                                           |              |                                                    |
| Baseline disease duration, years                           |                            |           |                                           |              |                                                    |
| < 20                                                       | 1.3 (0.9)                  | 1.3 (1.0) | 0.29 (0.03)                               | 0.13 (0.03)  | 0.17 (0.08, 0.25)                                  |
| <i>n</i>                                                   | 285                        | 274       | 255                                       | 236          |                                                    |
| ≥ 20                                                       | 0.9 (0.6)                  | 0.9 (0.6) | 0.11 (0.03)                               | 0.03 (0.03)  | 0.09 (0.00, 0.18)                                  |
| <i>n</i>                                                   | 243                        | 257       | 216                                       | 217          |                                                    |
| <hr/>                                                      |                            |           |                                           |              |                                                    |
| Baseline postbronchodilator FEV <sub>1</sub> reversibility |                            |           |                                           |              |                                                    |
| < 20%                                                      | 1.3 (0.9)                  | 1.2 (0.9) | 0.17 (0.03)                               | 0.04 (0.03)  | 0.13 (0.06, 0.20)                                  |
| <i>n</i>                                                   | 391                        | 388       | 352                                       | 331          |                                                    |
| ≥ 20%                                                      | 0.7 (0.4)                  | 0.9 (0.6) | 0.32 (0.04)                               | 0.19 (0.04)  | 0.13 (0.01, 0.26)                                  |
| <i>n</i>                                                   | 137                        | 143       | 119                                       | 122          |                                                    |
| <hr/>                                                      |                            |           |                                           |              |                                                    |
| Baseline postbronchodilator FEV <sub>1</sub> /FVC ratio    |                            |           |                                           |              |                                                    |
| < 0.7                                                      | 0.7 (0.3)                  | 0.7 (0.3) | 0.13 (0.03)                               | -0.02 (0.03) | 0.15 (0.07, 0.23)                                  |
| <i>n</i>                                                   | 304                        | 313       | 277                                       | 263          |                                                    |

|            |           |           |             |             |                   |
|------------|-----------|-----------|-------------|-------------|-------------------|
| $\geq 0.7$ | 1.8 (0.9) | 1.8 (1.0) | 0.32 (0.04) | 0.22 (0.04) | 0.10 (0.01, 0.20) |
| <i>n</i>   | 224       | 218       | 194         | 190         |                   |

---

Baseline combined postbronchodilator FEV<sub>1</sub> reversibility and postbronchodilator FEV<sub>1</sub>/FVC ratio

|                            |           |           |             |              |                    |
|----------------------------|-----------|-----------|-------------|--------------|--------------------|
| < 20% and < 0.7            | 0.7 (0.4) | 0.7 (0.3) | 0.13 (0.04) | -0.02 (0.04) | 0.15 (0.05, 0.25)  |
| <i>n</i>                   | 209       | 224       | 191         | 185          |                    |
| $\geq 20\%$ and < 0.7      | 0.6 (0.3) | 0.6 (0.3) | 0.20 (0.05) | 0.05 (0.06)  | 0.14 (0.00, 0.29)  |
| <i>n</i>                   | 95        | 89        | 86          | 78           |                    |
| < 20% and $\geq 0.7$       | 1.9 (0.9) | 2.0 (1.0) | 0.23 (0.04) | 0.12 (0.04)  | 0.11 (0.00, 0.21)  |
| <i>n</i>                   | 182       | 164       | 161         | 146          |                    |
| $\geq 20\%$ and $\geq 0.7$ | 1.2 (0.5) | 1.3 (0.6) | 0.56 (0.08) | 0.37 (0.07)  | 0.19 (-0.02, 0.40) |
| <i>n</i>                   | 42        | 54        | 33          | 44           |                    |

11 *CI* confidence interval, *FEF*<sub>25-75</sub> forced expiratory flow between 25% and 75% of vital capacity, *FEV*<sub>1</sub> forced expiratory volume in 1 second,

12 *FVC* forced vital capacity, *LS* least-squares, *Q4W* every 4 weeks, *SD* standard deviation, *SE* standard error

13

14

15

16



17 **Table S4** Change from baseline to week 52 in postbronchodilator FEV<sub>1</sub> in patients grouped by disease duration

| Subgroup                         | Mean at baseline (SD), L/s |           | LS mean change from baseline (SE), L/s |             | LS mean difference<br>versus placebo (95% CI), L/s |
|----------------------------------|----------------------------|-----------|----------------------------------------|-------------|----------------------------------------------------|
|                                  | Tezepelumab<br>210 mg Q4W  | Placebo   | Tezepelumab<br>210 mg Q4W              | Placebo     |                                                    |
| Baseline disease duration, years |                            |           |                                        |             |                                                    |
| < 20                             | 2.2 (0.8)                  | 2.2 (0.9) | 0.19 (0.02)                            | 0.06 (0.02) | 0.13 (0.07, 0.20)                                  |
| n                                | 285                        | 274       | 285                                    | 274         |                                                    |
| ≥ 20                             | 1.9 (0.7)                  | 2.0 (0.6) | 0.10 (0.03)                            | 0.01 (0.02) | 0.09 (0.02, 0.16)                                  |
| n                                | 243                        | 257       | 243                                    | 257         |                                                    |

18 *CI* confidence interval, *FEV*<sub>1</sub> forced expiratory volume in 1 second, *LS* least-squares, *Q4W* every 4 weeks, *SD* standard deviation, *SE* standard

19 error

**Table S5** Lung function at baseline and at week 52 in patients grouped by disease duration

| Baseline disease duration, years | Treatment group                  | Prebronchodilator ppFEV <sub>1</sub> at week 52, n (%) |                  |                |           |
|----------------------------------|----------------------------------|--------------------------------------------------------|------------------|----------------|-----------|
|                                  |                                  | Prebronchodilator ppFEV <sub>1</sub> at baseline       | Abnormal (< 80%) | Normal (≥ 80%) | Missing   |
| < 20                             | Tezepelumab 210 mg Q4W (N = 285) | Abnormal (< 80%; n = 214)                              | 134 (62.6)       | 62 (29.0)      | 18 (8.4)  |
|                                  |                                  | Normal (≥ 80%; n = 71)                                 | 13 (18.3)        | 46 (64.8)      | 12 (16.9) |
|                                  | Placebo (N = 274)                | Abnormal (< 80%; n = 214)                              | 157 (73.4)       | 24 (11.2)      | 33 (15.4) |
|                                  |                                  | Normal (≥ 80%; n = 60)                                 | 17 (28.3)        | 38 (63.3)      | 5 (8.3)   |
| ≥ 20                             | Tezepelumab 210 mg Q4W (N = 243) | Abnormal (< 80%; n = 220)                              | 171 (77.7)       | 25 (11.4)      | 24 (10.9) |
|                                  |                                  | Normal (≥ 80%; n = 23)                                 | 4 (17.4)         | 16 (69.6)      | 3 (13.0)  |
|                                  | Placebo (N = 257)                | Abnormal (< 80%; n = 227)                              | 170 (74.9)       | 24 (10.6)      | 33 (14.5) |
|                                  |                                  | Normal (≥ 80%; n = 30)                                 | 9 (30.0)         | 14 (46.7)      | 7 (23.3)  |

Baseline was defined as the last non-missing measurement recorded before randomization

ppFEV<sub>1</sub>, percent predicted forced expiratory volume in 1 second, Q4W every 4 weeks

**Table S6** Change from baseline to week 52 in prebronchodilator FEV<sub>1</sub> in patients grouped by number and type of additional controllers

| Subgroup                                                                                          | Tezepelumab 210 mg Q4W |                 | Placebo  |                 | LS mean (95% CI)<br>difference versus<br>placebo, L |
|---------------------------------------------------------------------------------------------------|------------------------|-----------------|----------|-----------------|-----------------------------------------------------|
|                                                                                                   | <i>n</i>               | LS mean (SE), L | <i>n</i> | LS mean (SE), L |                                                     |
| <b>Number of additional controllers</b>                                                           |                        |                 |          |                 |                                                     |
| 1                                                                                                 | 240                    | 0.22 (0.03)     | 252      | 0.12 (0.03)     | 0.10 (0.03, 0.18)                                   |
| 2                                                                                                 | 184                    | 0.23 (0.03)     | 197      | 0.09 (0.03)     | 0.13 (0.05, 0.22)                                   |
| ≥ 3                                                                                               | 103                    | 0.26 (0.04)     | 82       | 0.04 (0.05)     | 0.22 (0.10, 0.34)                                   |
| <b>Additional controllers</b>                                                                     |                        |                 |          |                 |                                                     |
| LABA alone                                                                                        | 236                    | 0.23 (0.03)     | 244      | 0.11 (0.03)     | 0.11 (0.04, 0.19)                                   |
| LABA + LTRA                                                                                       | 112                    | 0.26 (0.04)     | 112      | 0.12 (0.04)     | 0.14 (0.03, 0.25)                                   |
| LABA + LAMA                                                                                       | 50                     | 0.20 (0.06)     | 62       | 0.07 (0.06)     | 0.13 (-0.03, 0.29)                                  |
| LABA + LAMA + LTRA                                                                                | 52                     | 0.28 (0.06)     | 50       | -0.01 (0.06)    | 0.28 (0.12, 0.45)                                   |
| Other controllers                                                                                 | 77                     | 0.18 (0.05)     | 63       | 0.08 (0.05)     | 0.10 (-0.04, 0.24)                                  |
| <b>Additional controllers used by patients who were not receiving maintenance OCS at baseline</b> |                        |                 |          |                 |                                                     |
| LABA alone                                                                                        | 225                    | 0.22 (0.03)     | 234      | 0.11 (0.03)     | 0.10 (0.03, 0.18)                                   |
| LABA + LTRA                                                                                       | 107                    | 0.26 (0.04)     | 102      | 0.14 (0.04)     | 0.13 (0.02, 0.24)                                   |
| LABA + LAMA                                                                                       | 47                     | 0.21 (0.06)     | 48       | 0.10 (0.06)     | 0.10 (-0.06, 0.27)                                  |
| LABA + LAMA + LTRA                                                                                | 39                     | 0.27 (0.07)     | 44       | -0.02 (0.06)    | 0.29 (0.11, 0.47)                                   |
| Other controllers                                                                                 | 60                     | 0.14 (0.05)     | 52       | 0.09 (0.06)     | 0.05 (-0.10, 0.20)                                  |

*CI* confidence interval, *FEV*<sub>1</sub> forced expiratory volume in 1 second, *LABA* long-acting β<sub>2</sub> agonist, *LAMA* long-acting muscarinic antagonist, *LS* least-squares, *LTRA* leukotriene receptor antagonist, *n* number of patients contributing to the analysis, *OCS* oral corticosteroids, *Q4W* every 4 weeks, *SE* standard error

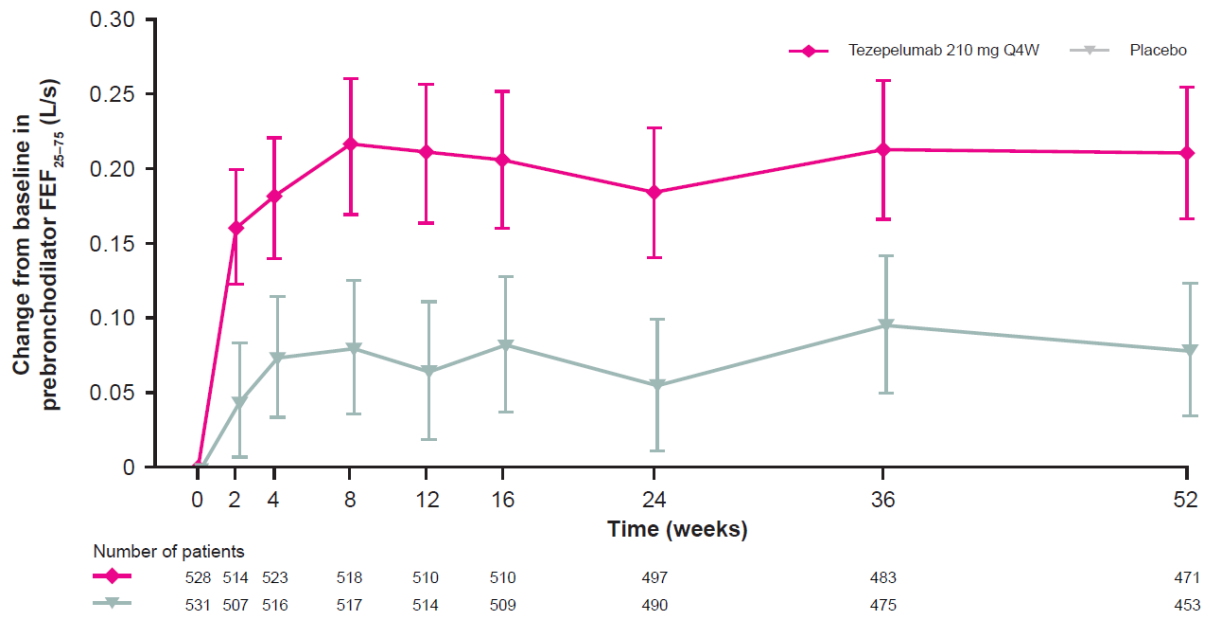

**Fig. S1** Change from baseline in prebronchodilator  $FEF_{25-75}$  over 52 weeks. Data are adjusted means and 95% CIs. 'Number of patients' indicates the number of patients with available data at a given time point. Patients who received at least one dose of tezepelumab or placebo with at least one change from baseline assessment were included in the model. *CI* confidence interval,  $FEF_{25-75}$  forced expiratory flow between 25% and 75% of vital capacity, *Q4W* every 4 weeks

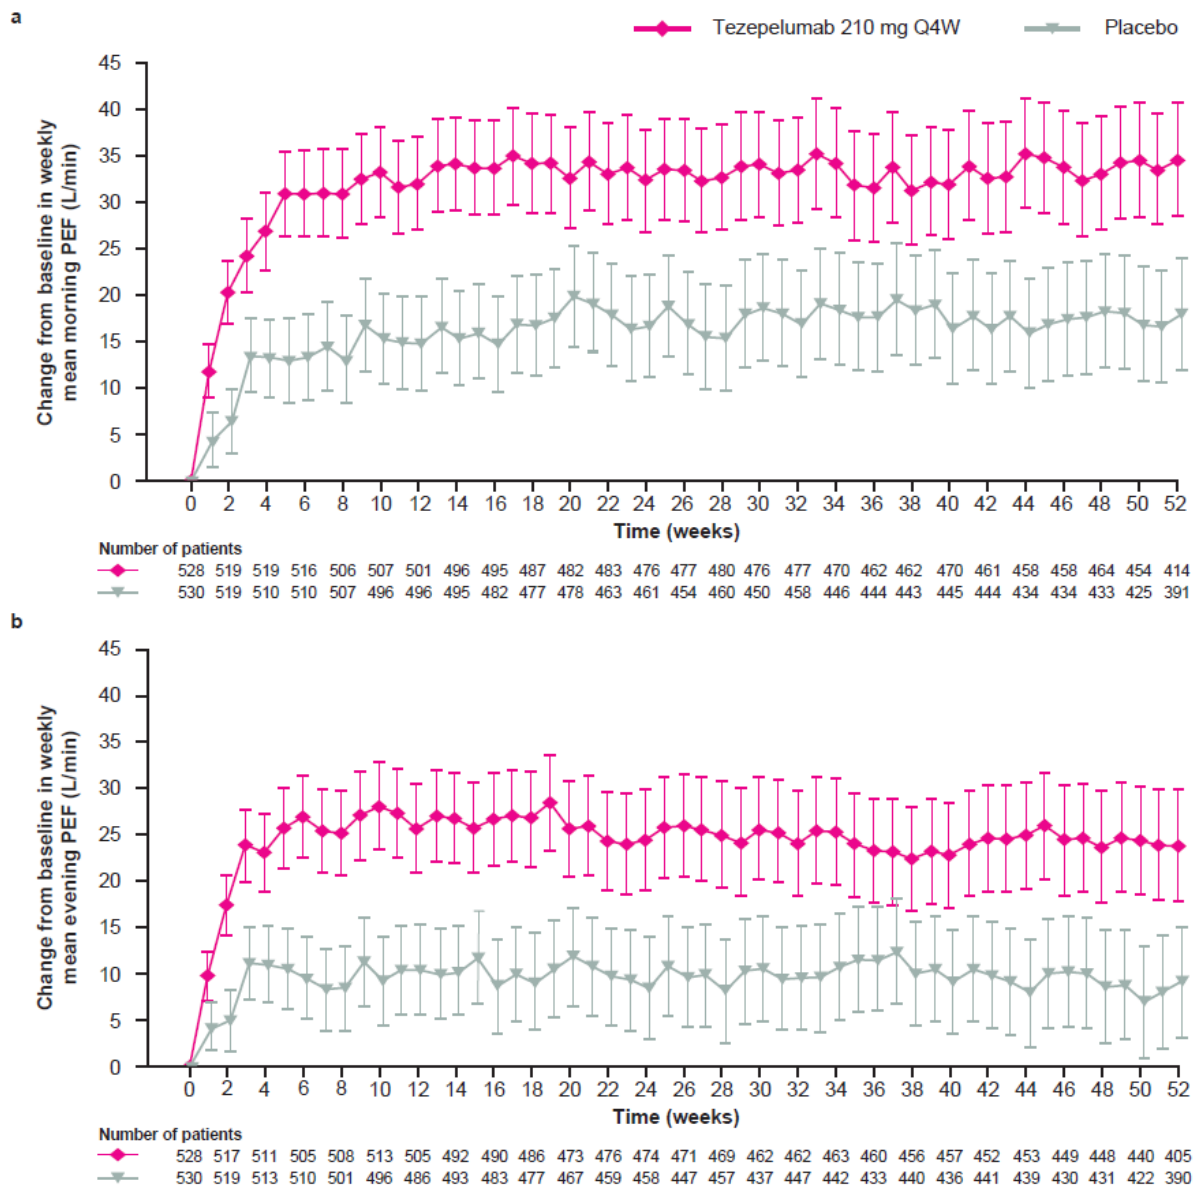

**Fig. S2** Change from baseline to week 52 in (a) weekly mean morning PEF and (b) weekly mean evening PEF. 'Number of patients' indicates the number of patients with available data at a given time point. Patients who received at least one dose of tezepelumab or placebo with at least one change from baseline assessment were included in the model. Data are adjusted means and 95% CIs. *CI* confidence interval, *PEF* peak expiratory flow, *Q4W* every 4 weeks

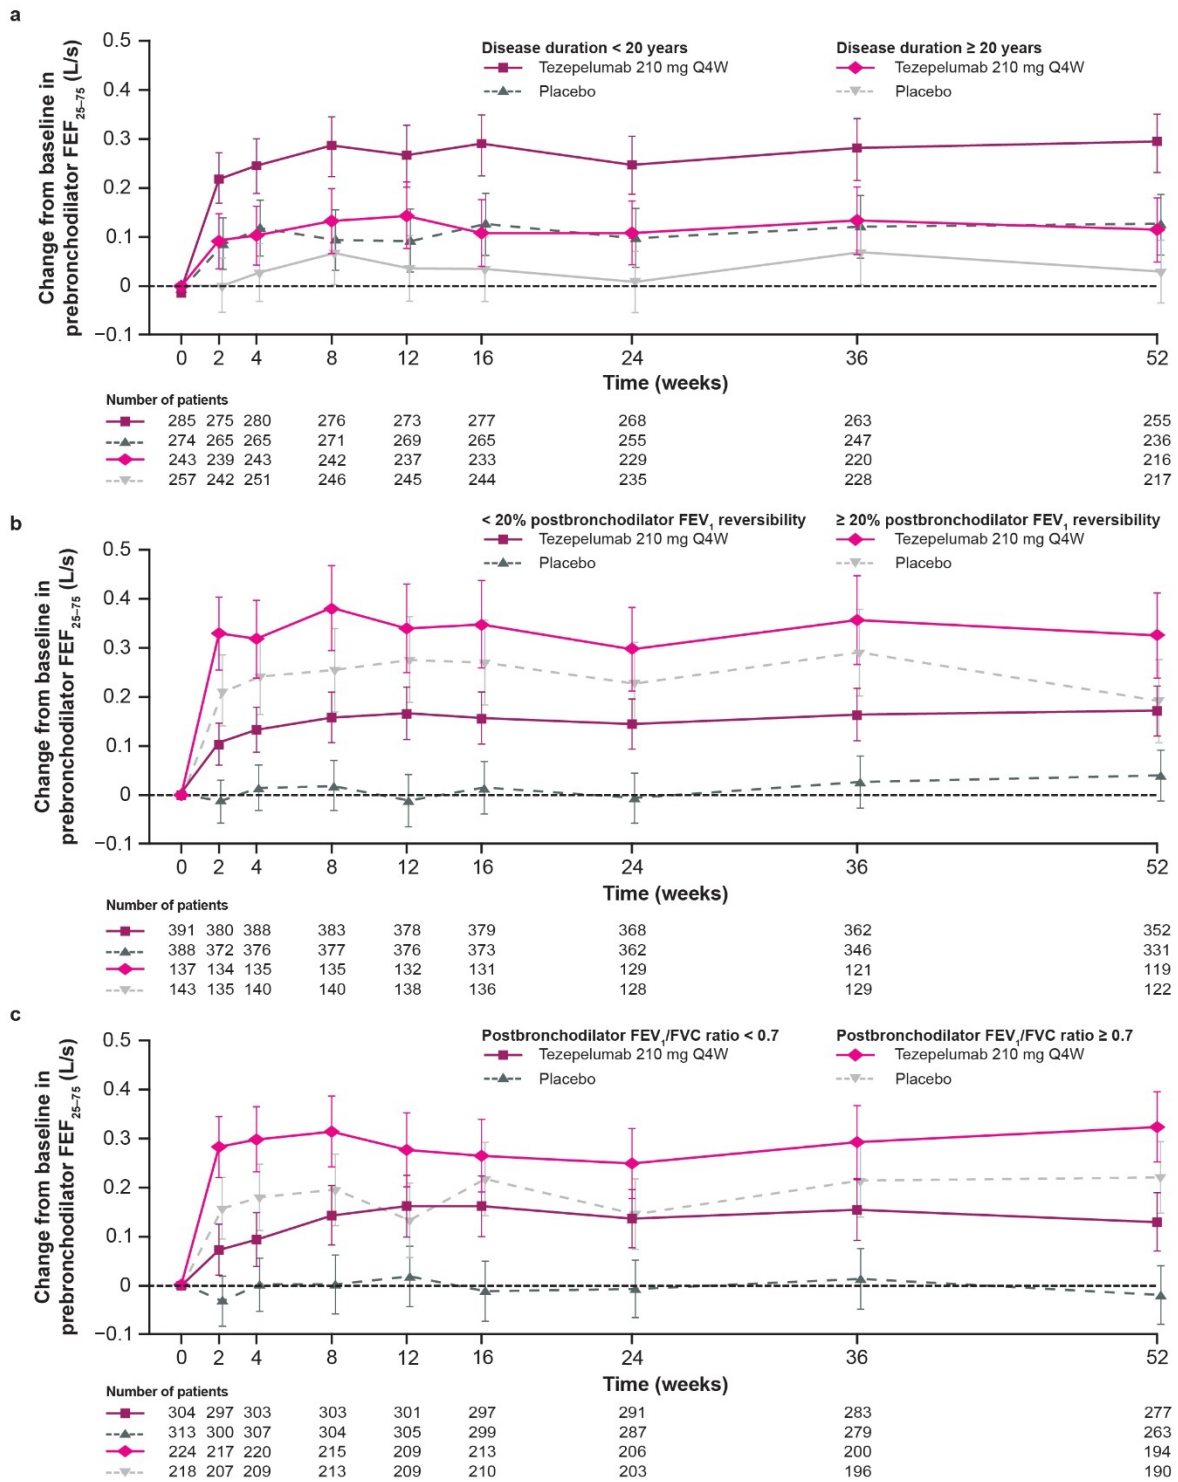

**Fig. S3** Change from baseline in prebronchodilator FEV<sub>25-75</sub> over 52 weeks in patients grouped by (a) disease duration, (b) baseline post-bronchodilator FEV<sub>1</sub> reversibility, and (c) postbronchodilator FEV<sub>1</sub>/FVC ratio. 'Number of patients' indicates the number of patients with available data at a given time point. Patients who received at least one dose of tezepelumab or placebo with at least one change from baseline assessment were included

in the model. Data are adjusted means and 95% CIs. *CI* confidence interval,  $FEF_{25-75}$  forced expiratory flow between 25% and 75% of vital capacity,  $FEV_1$  forced expiratory volume in 1 second, *FVC* forced vital capacity, *Q4W* every 4 weeks
